# Supplementary material
Source: bioRxiv or medRxiv preprint supplement (https://medrxiv.org/highwire/filestream/97094/field_highwire_adjunct_files/0/2020.09.15.20194258-1.pdf)

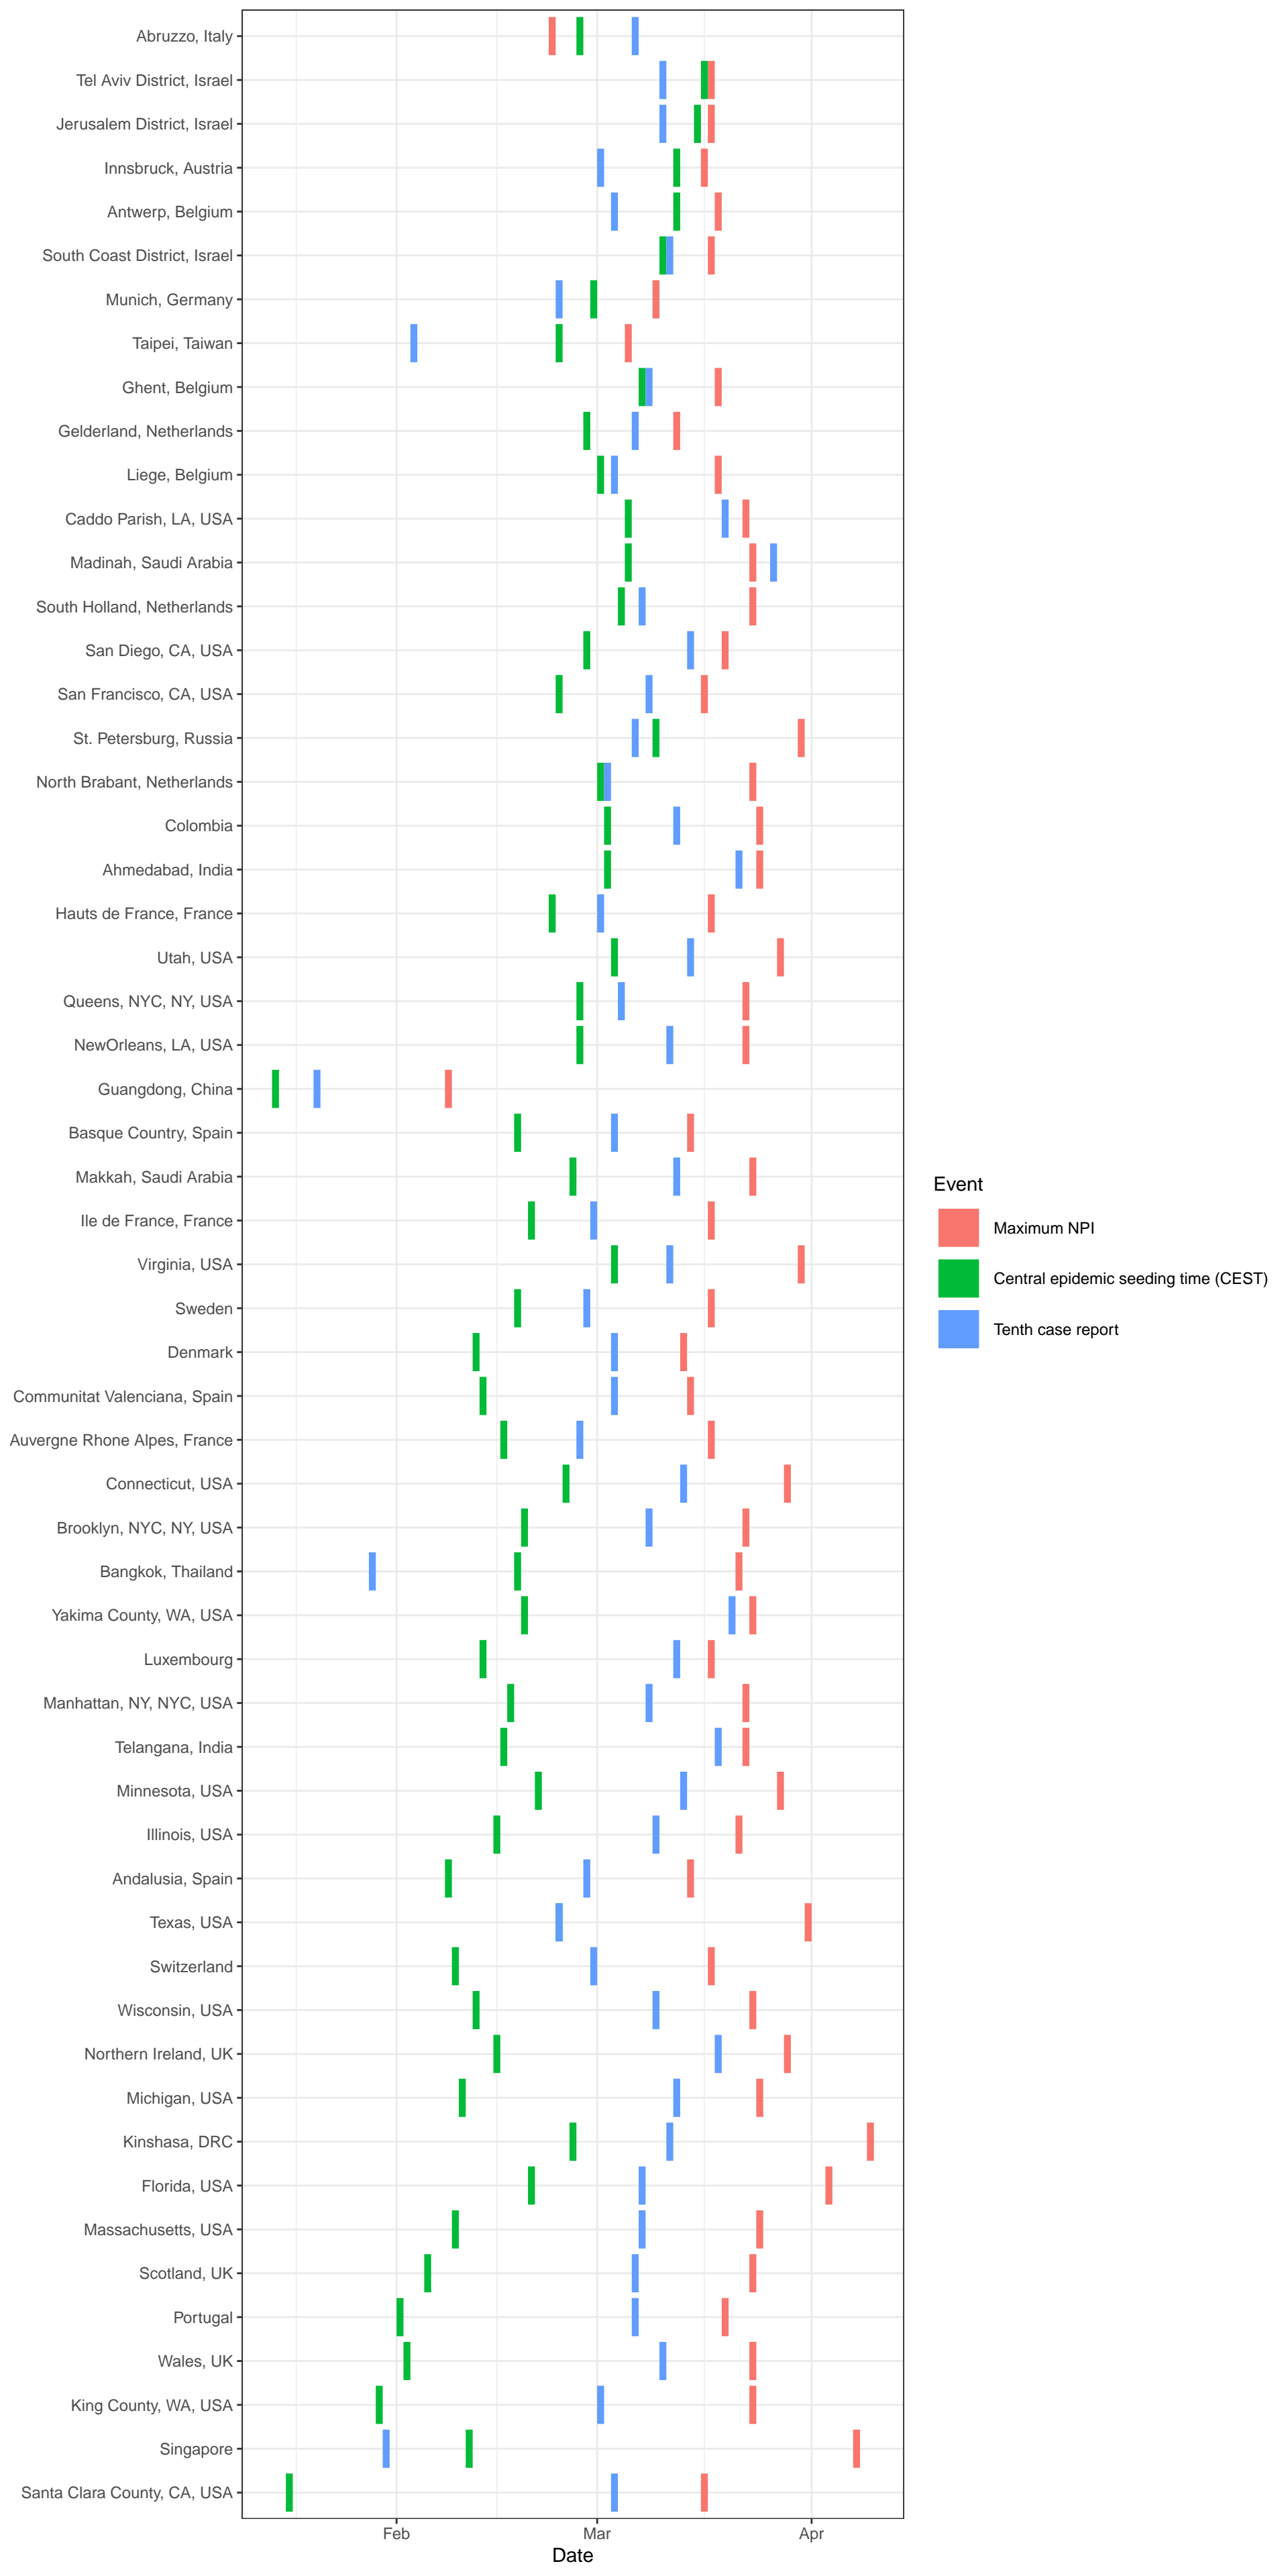

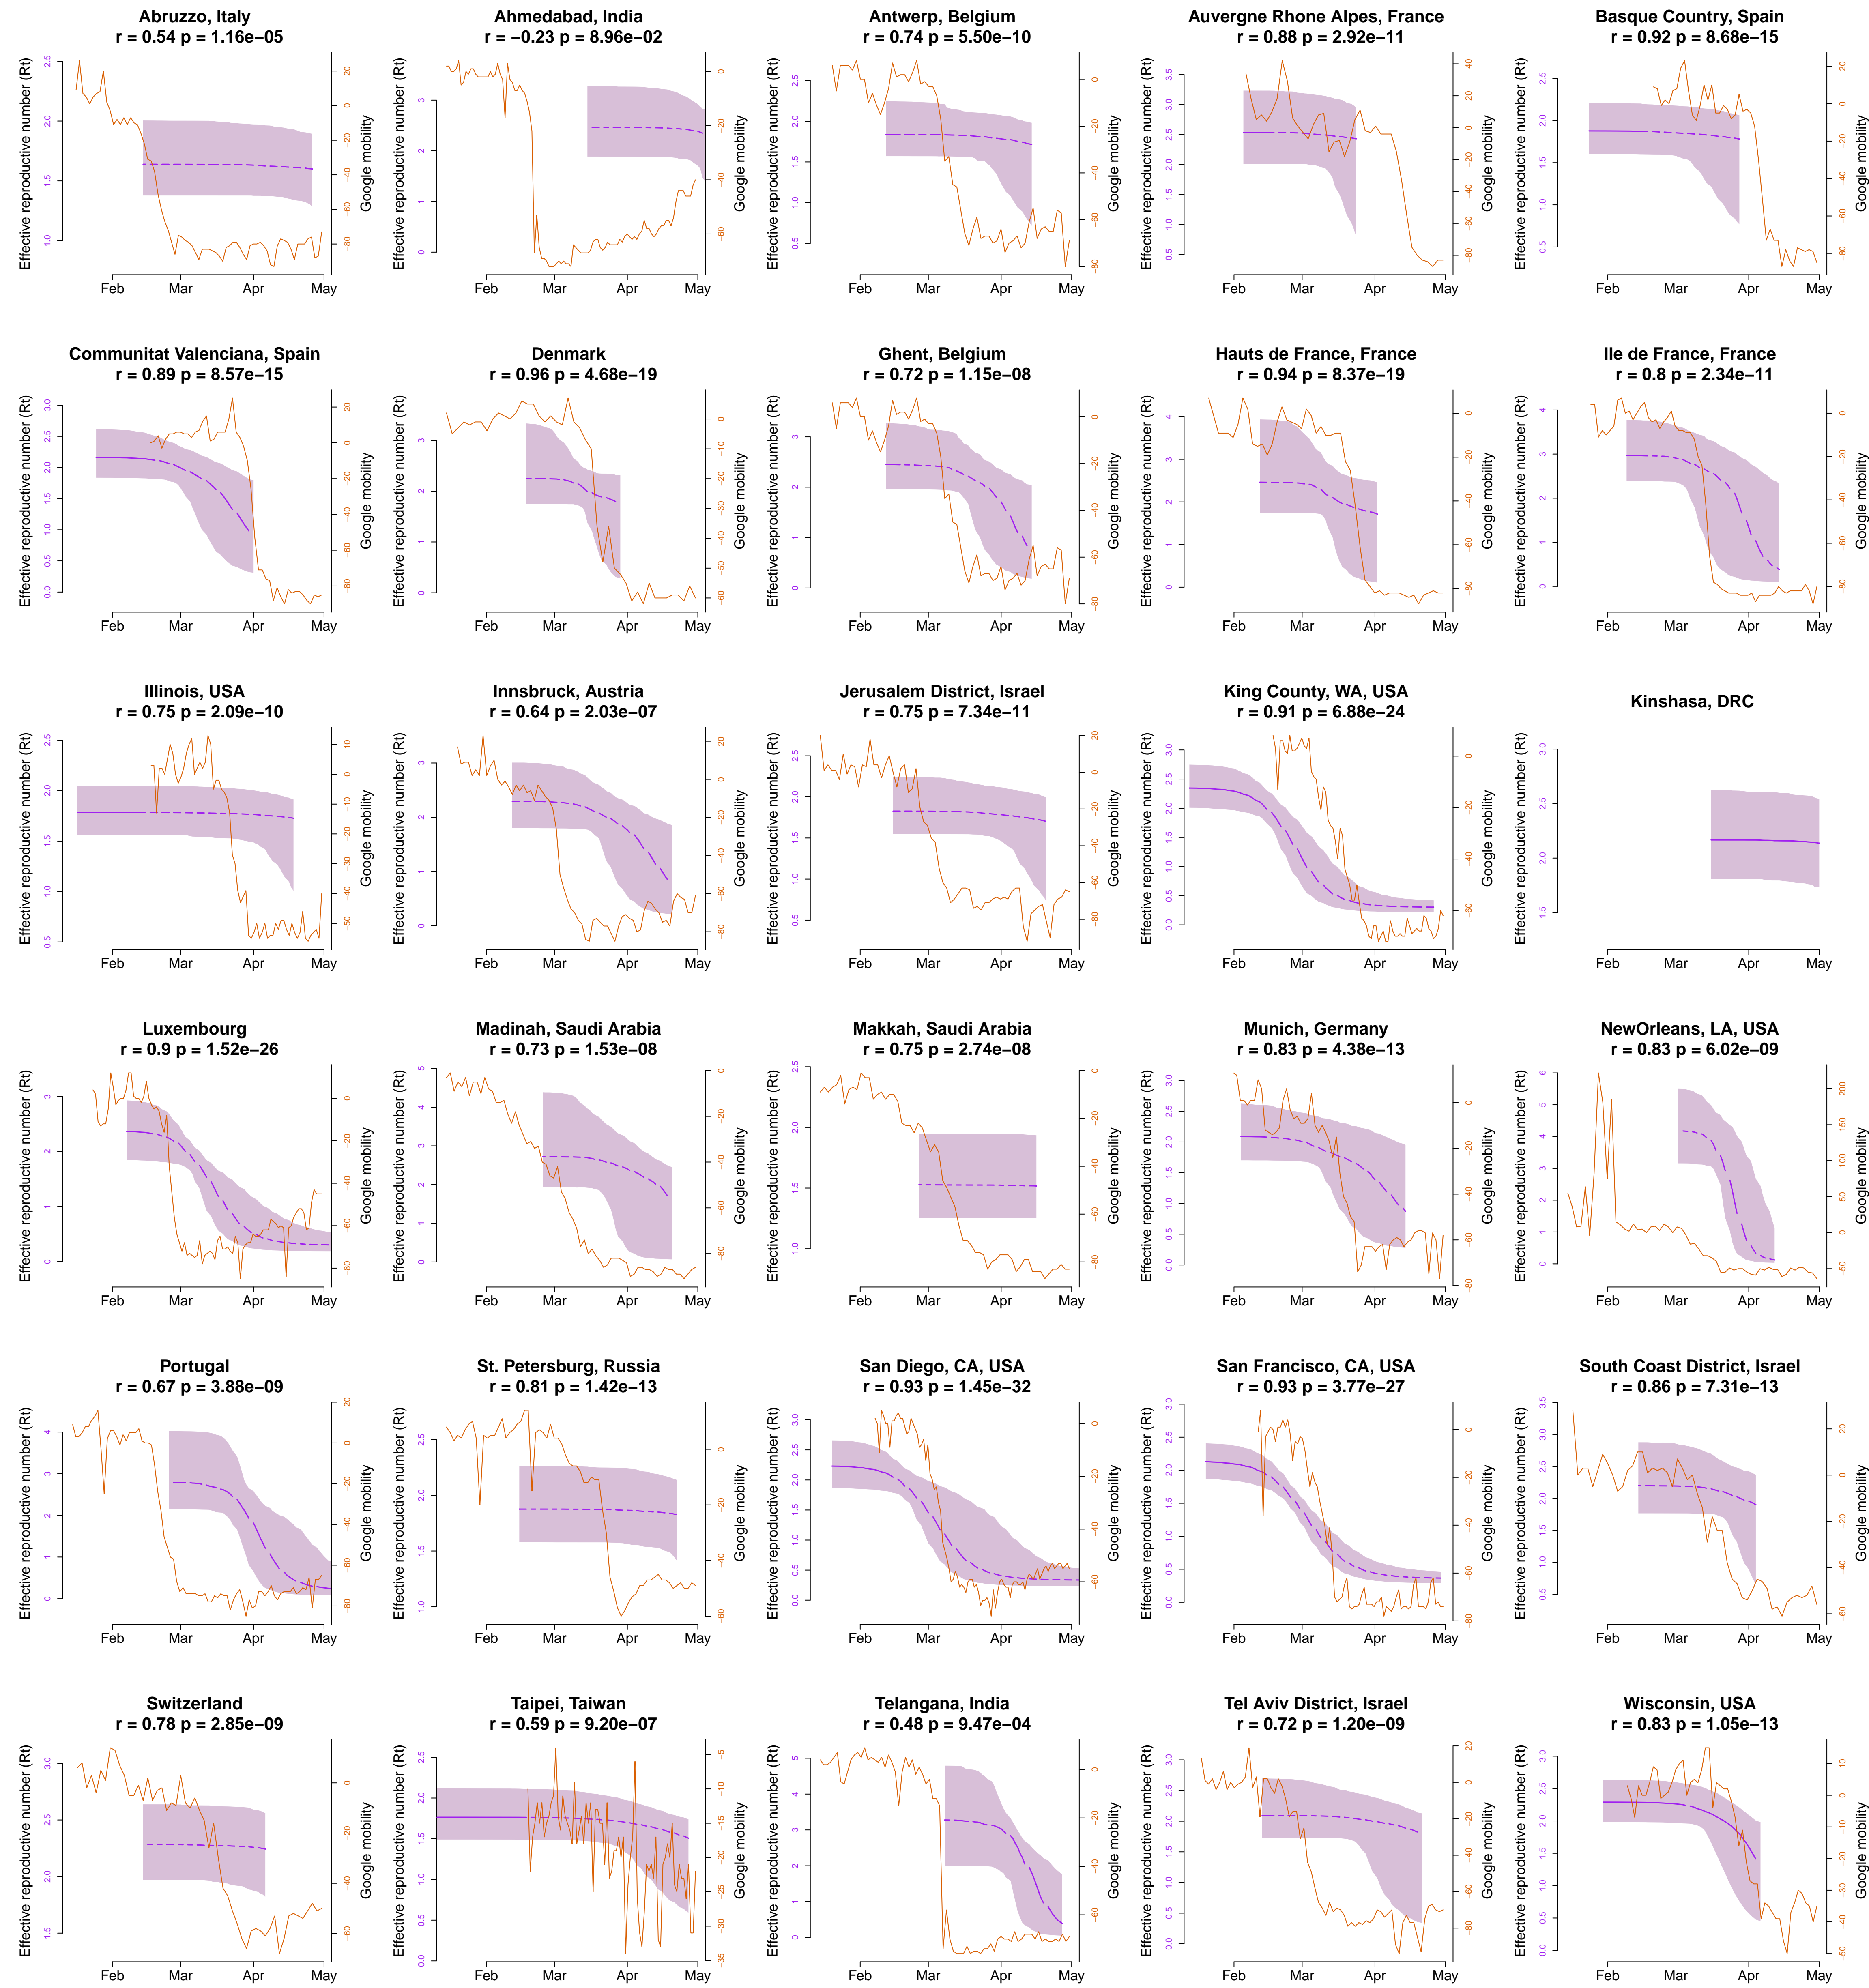

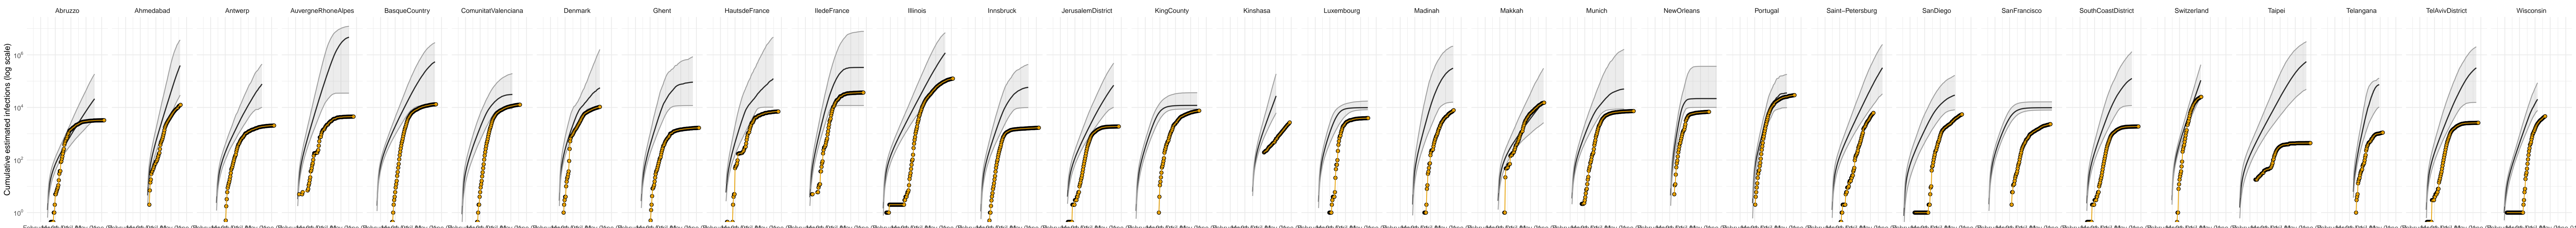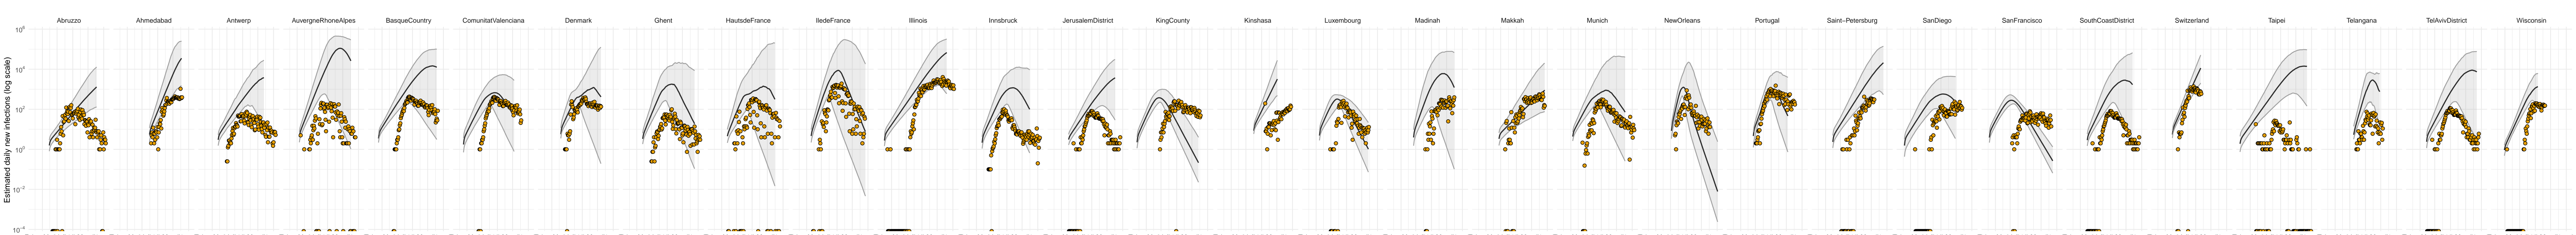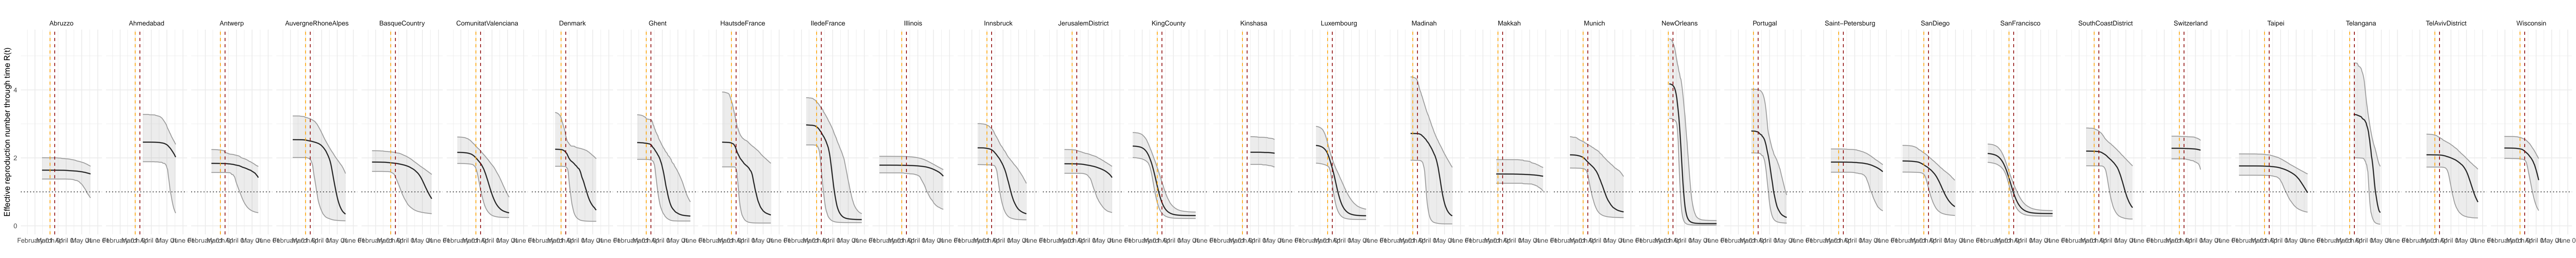



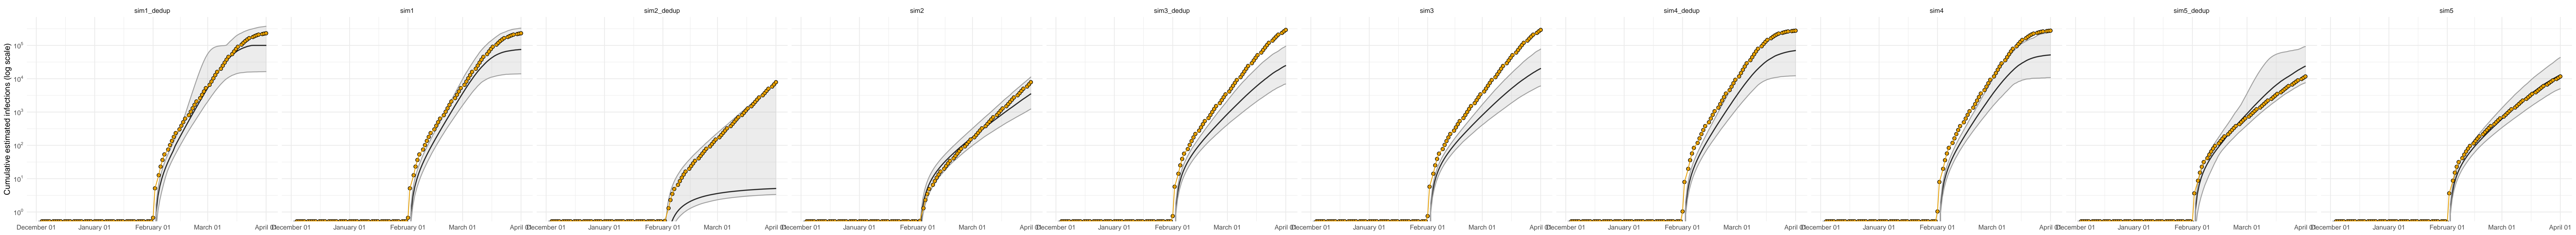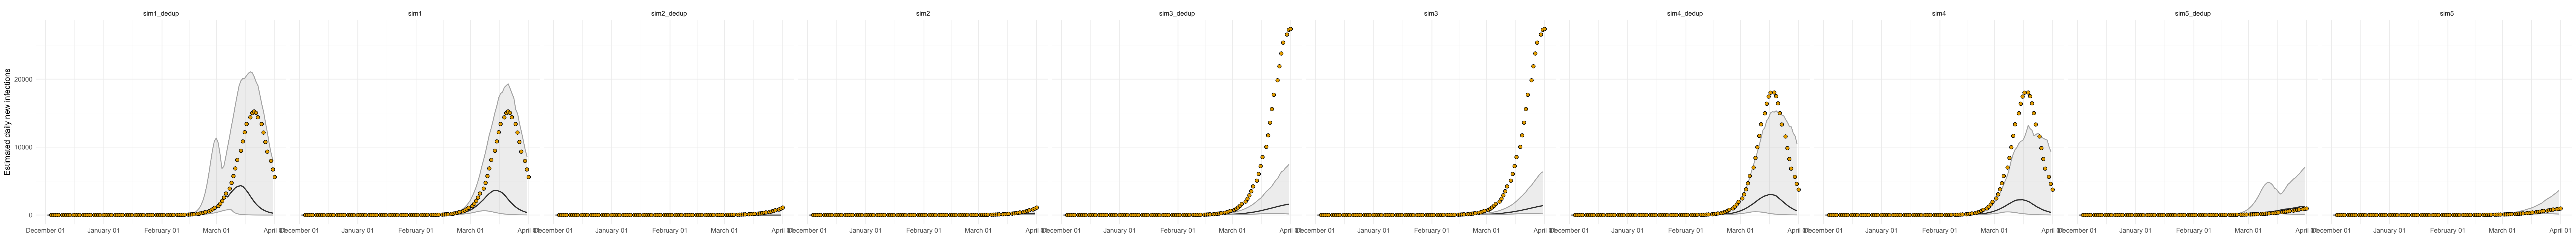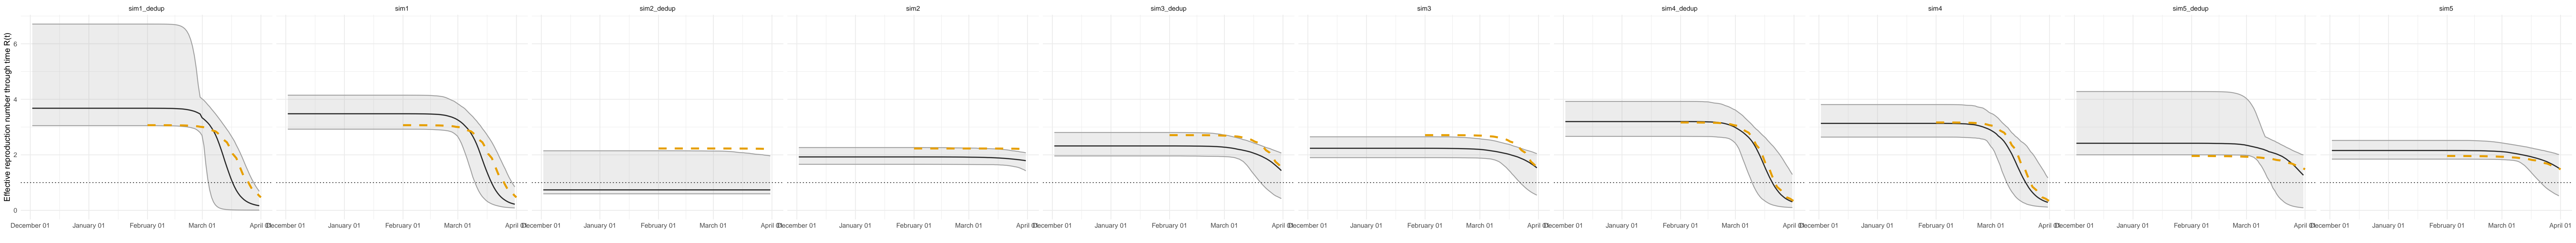

Supplement: Supplementary file [file 2020.09.15.20194258-1.pdf]
